# Supplementary material
Source: publisher figshare collection journal article supplement (https://rs.figshare.com/ndownloader/files/13206014)
Supplement: Supplementary file 1 [file 13206014]

## Title

Mechanism of memory effect of paste which dominates desiccation crack patterns

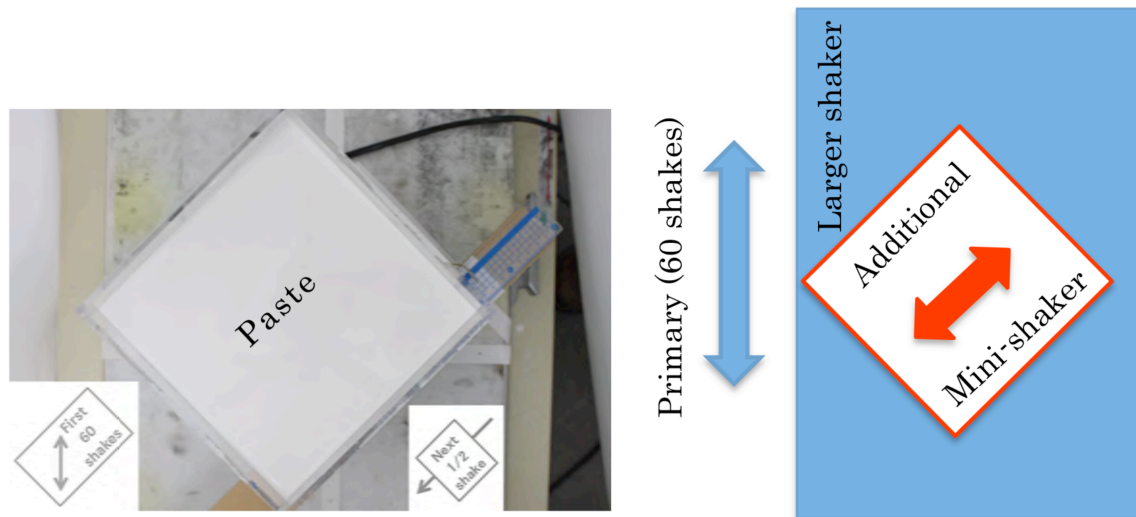

### Supplementary Figure 1: Directions of primary and additional shakes.

The protocol of rewriting-memory experiments is explained here. (a) A mini-shaker Model M-6 (Takashow, Japan) is set on a medium size shaker NR-80 (TAITEC, Koshigaya, Japan), which is larger than the mini-shaker. We pour a water-poor paste of calcium carbonate into an acrylic container with 200mm each side, which is set on a mini-shaker. (b) Directions of shakes. First the paste is primarily vibrated horizontally in one direction (indicated by a blue arrow) for 60 shakes by a larger shaker. Next it is additionally vibrated horizontally by a mini-shaker but in a different direction (indicated by a red arrow), the angle of which is  $\pi/4$  different from the first one (blue). The duration of the additional vibration is regarded as a controlling parameter in each experiment.

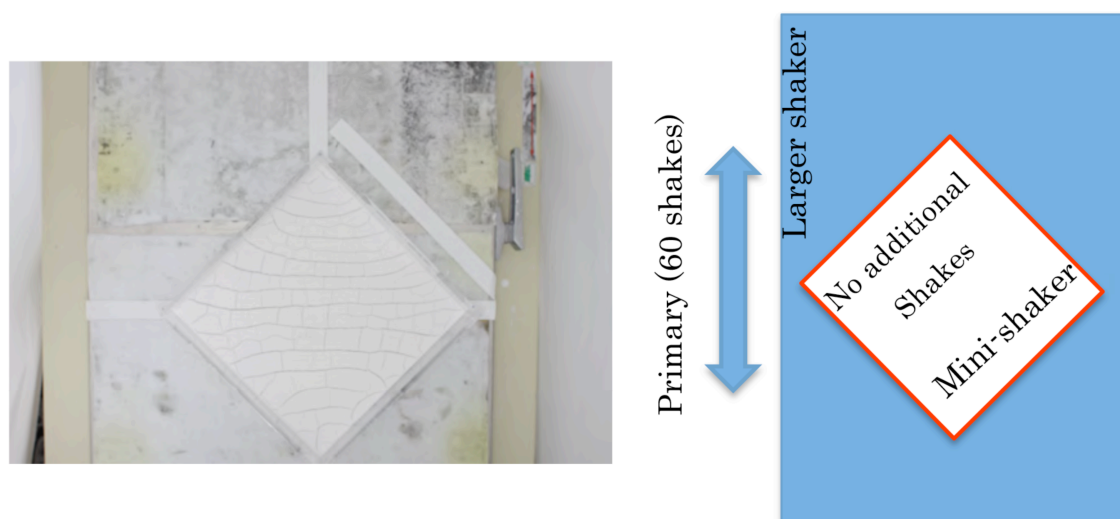

### Supplementary Figure 2: No additional shakes.

All main cracks propagate in a direction perpendicular to the direction of primary 60 shakes.

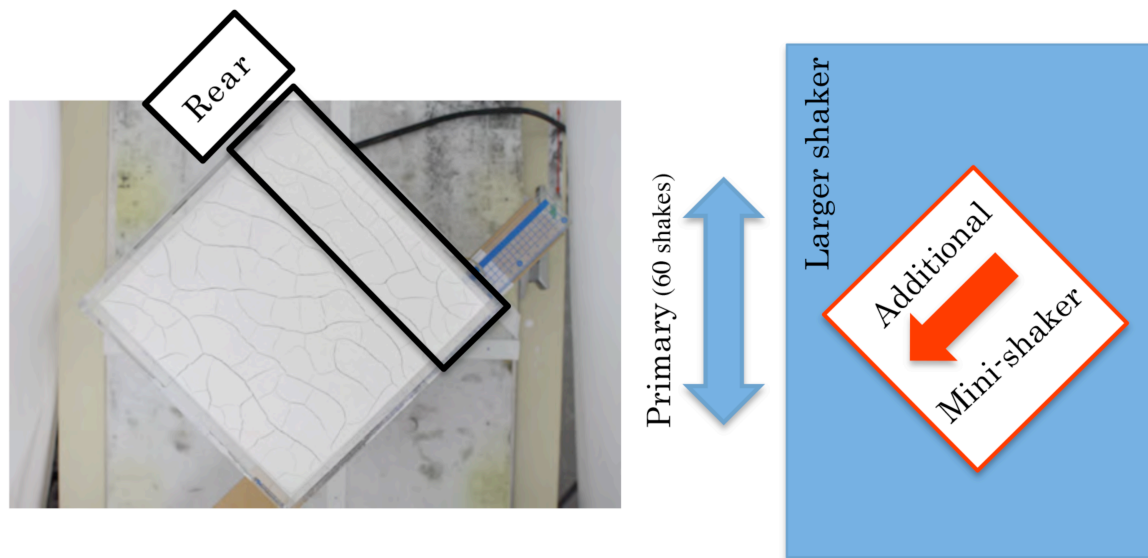

**Supplementary Figure 3: Duration of additional shakes is 1/2 shake.**

Note that the region represented as an open rectangle surrounded by bold lines is a rear region at an emergency braking and there the memory of primary vibration is replaced by the memory of additional vibration.

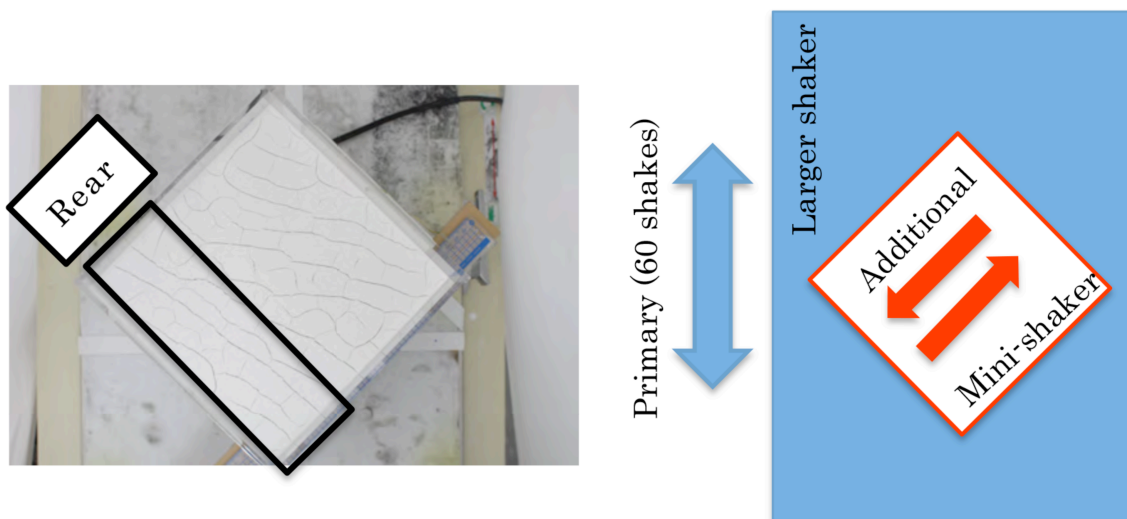

**Supplementary Figure 4: Duration of additional shakes is 1 shake.**

Note that the region represented as an open rectangle surrounded by bold lines is a rear region at an emergency braking and there the memory of primary vibration is replaced by the memory of additional vibration.

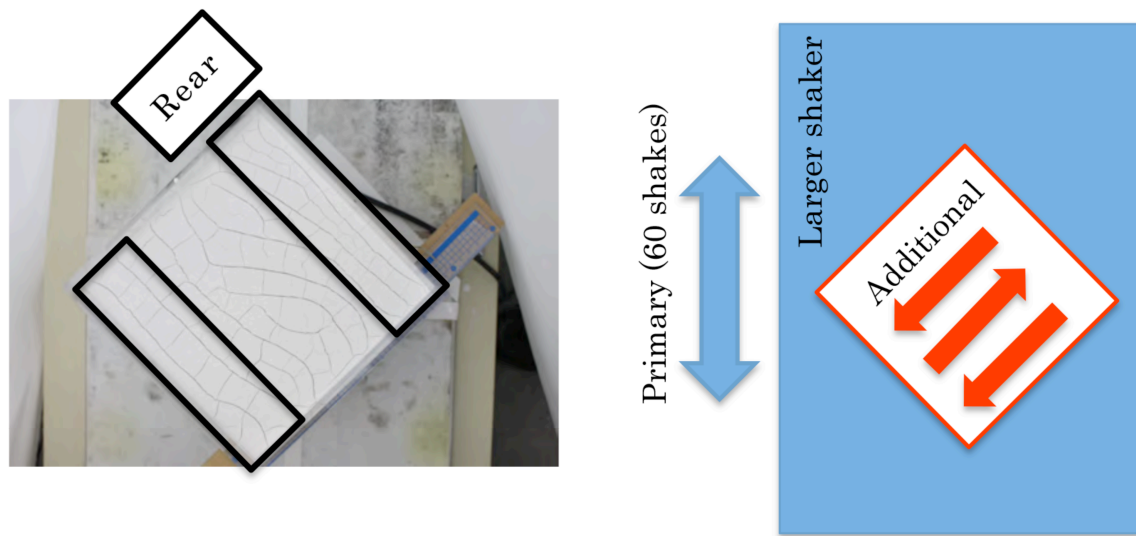

**Supplementary Figure 5: Duration of additional shakes is 1.5 shakes.**

While a memory of primary vibration is replaced by the memory of additional vibration in a rear region at an emergency braking, the memory of additional vibration still remains in a former rear region just after the 1 additional shake (the rear region in Fig. S4) due to the non-linear effect.

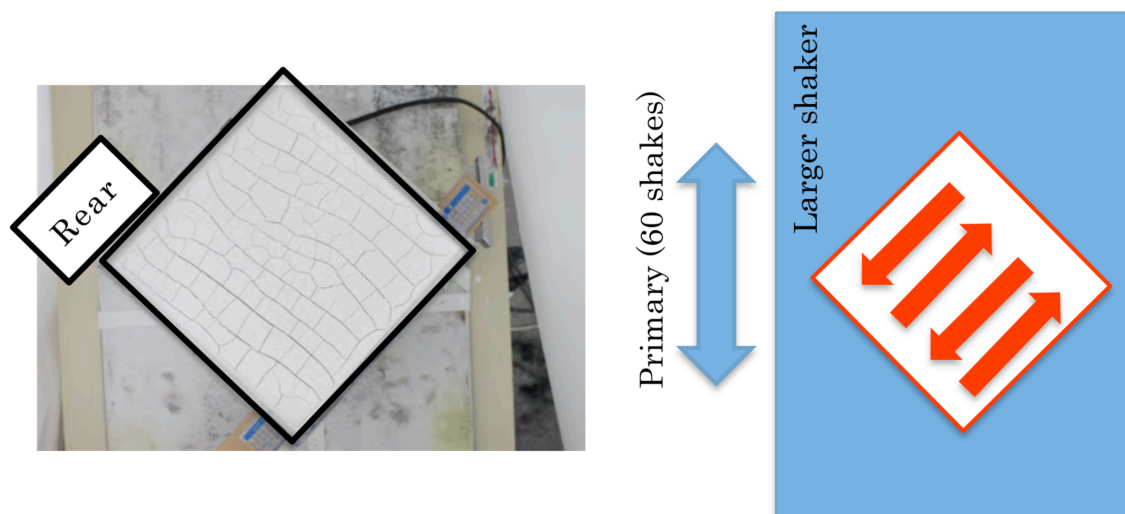

**Supplementary Figure 6: Duration of additional shakes is 2 shakes.**

This figure shows that 2 additional shakes is enough to rewrite new memory on old memory everywhere in the system.
